# Supplementary figures and images for: Construction of a TP53 mutation-associated ceRNA network as prognostic biomarkers in hepatocellular carcinoma
Source: PubMed Central journal article supplement — Heliyon. 2024 Apr 30;10(9):e30066. doi: 10.1016/j.heliyon.2024.e30066 (PMC11088256; doi:10.1016/j.heliyon.2024.e30066), 2024-04-30

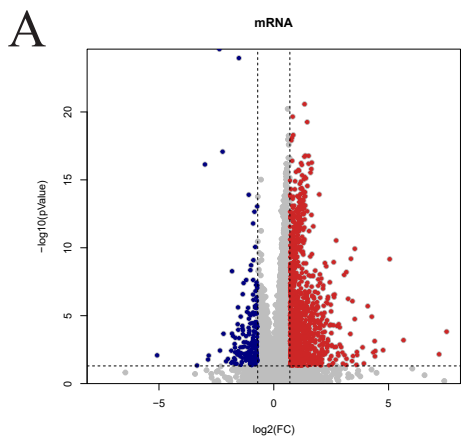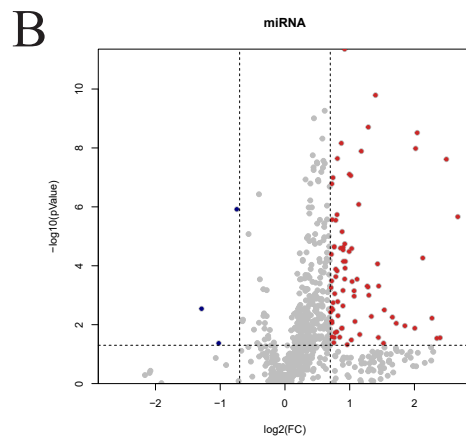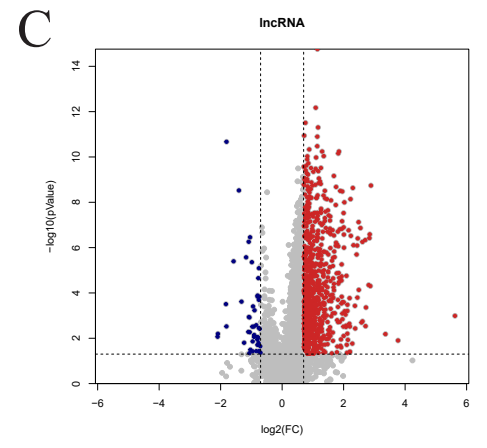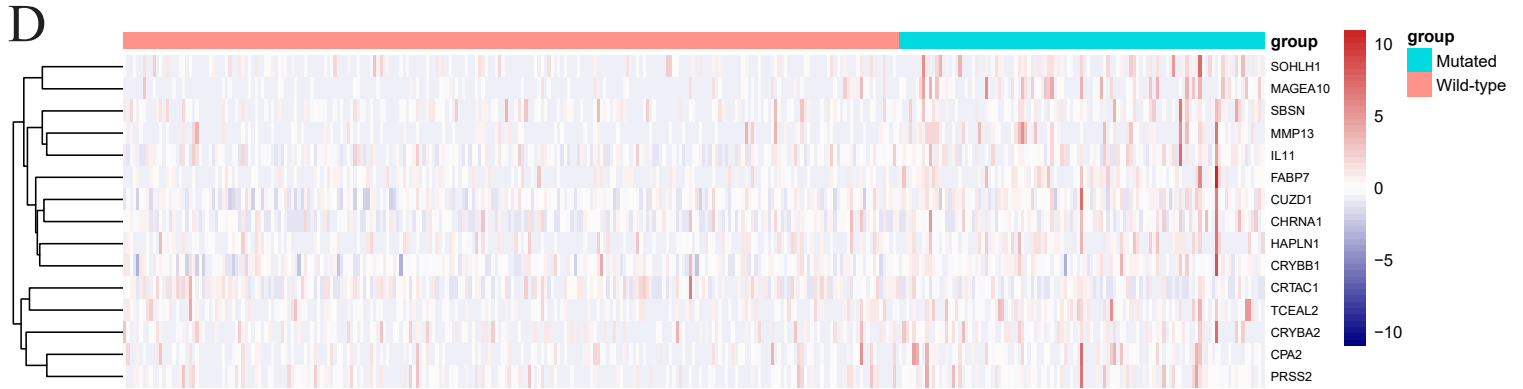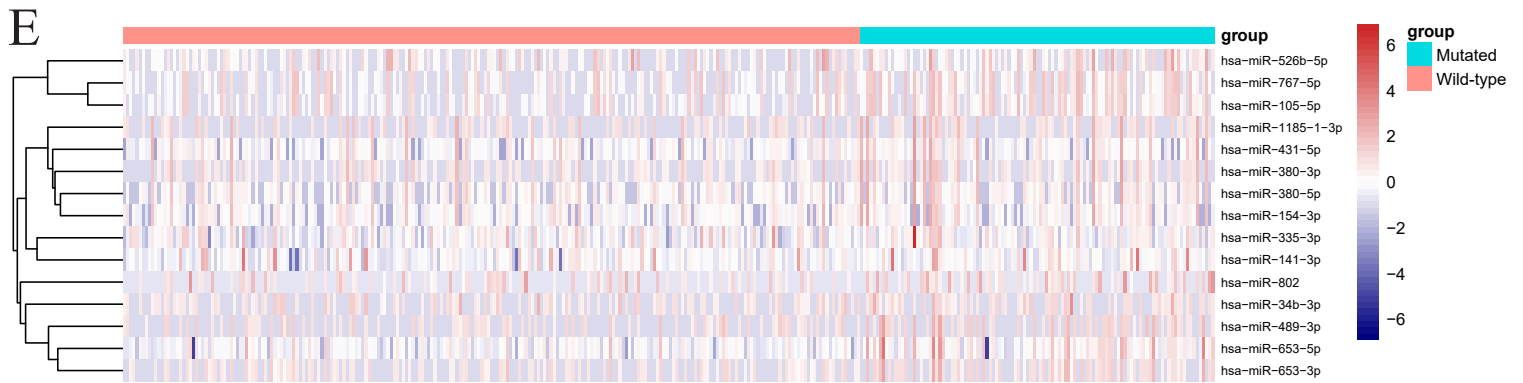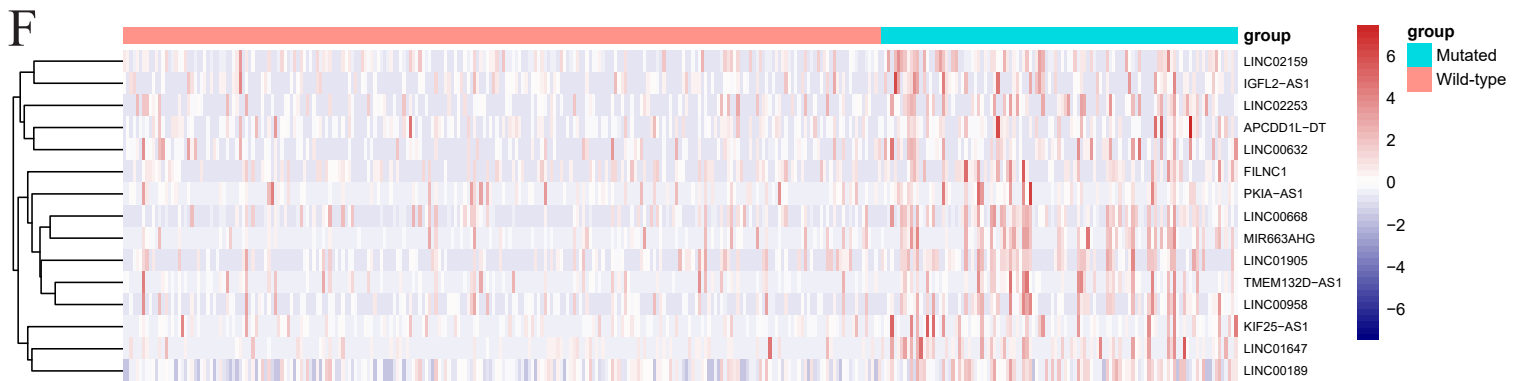

Supplement: mmc1.pdf [file mmc1.pdf]

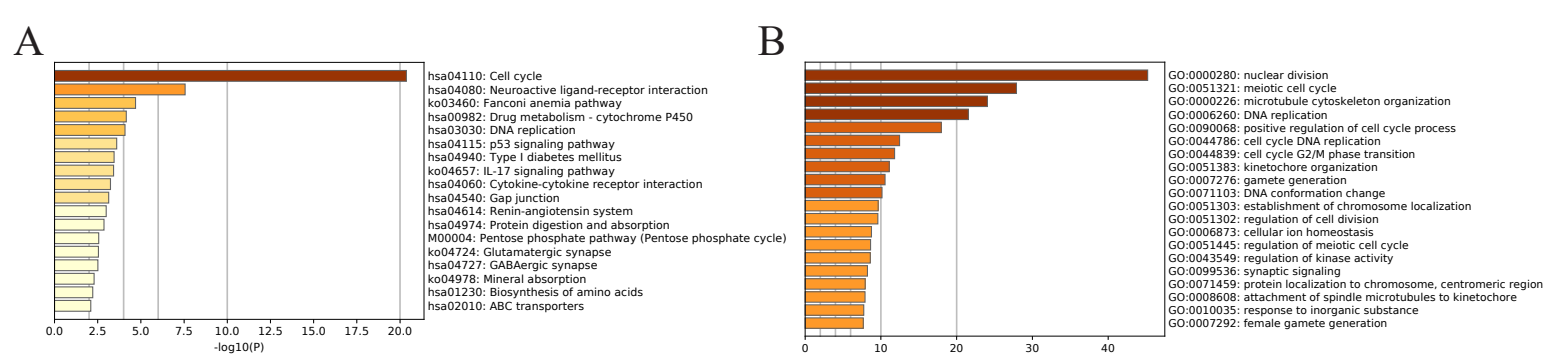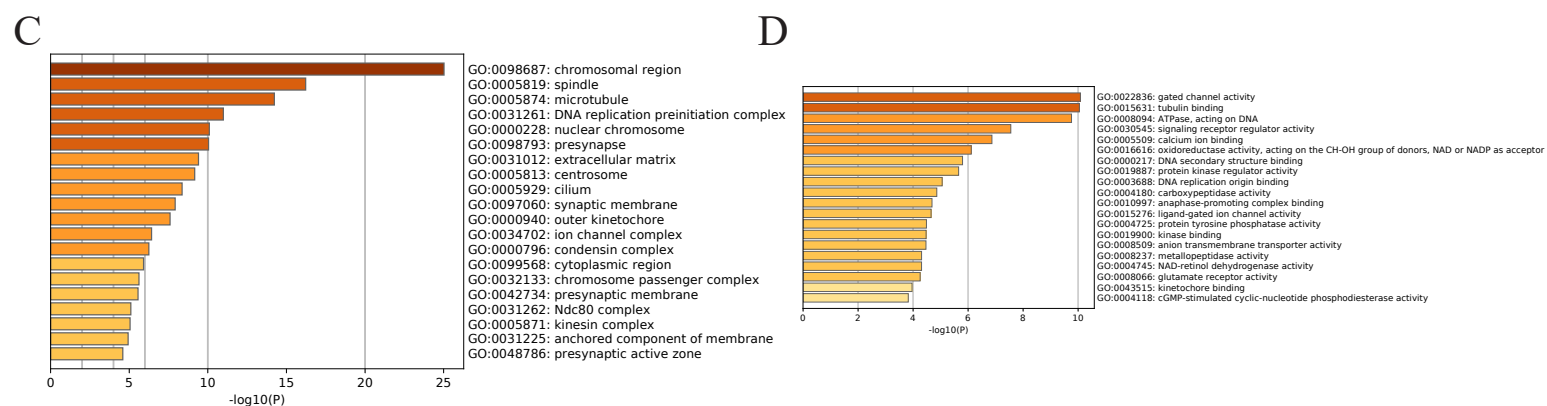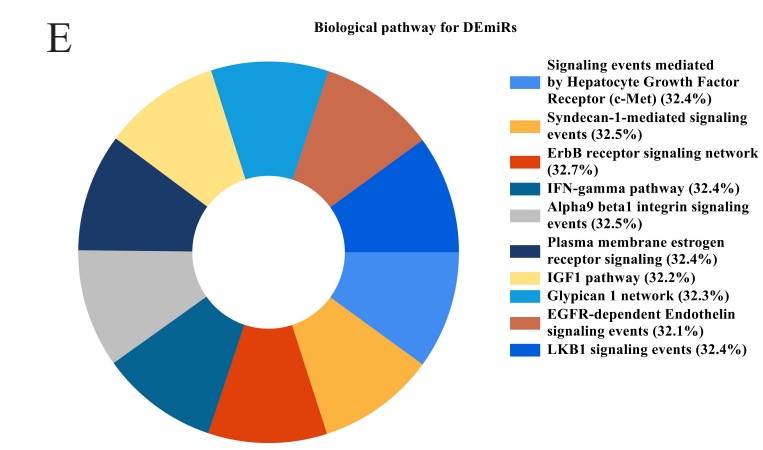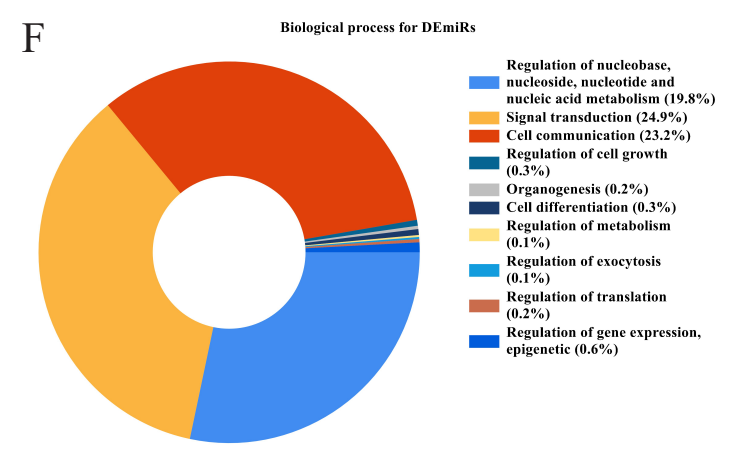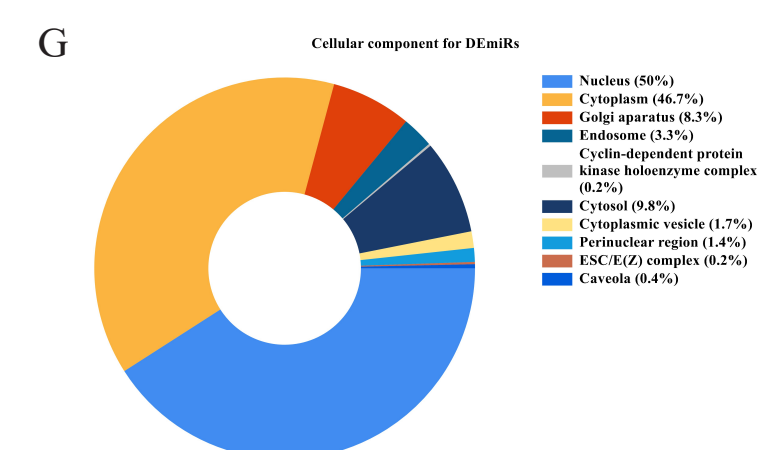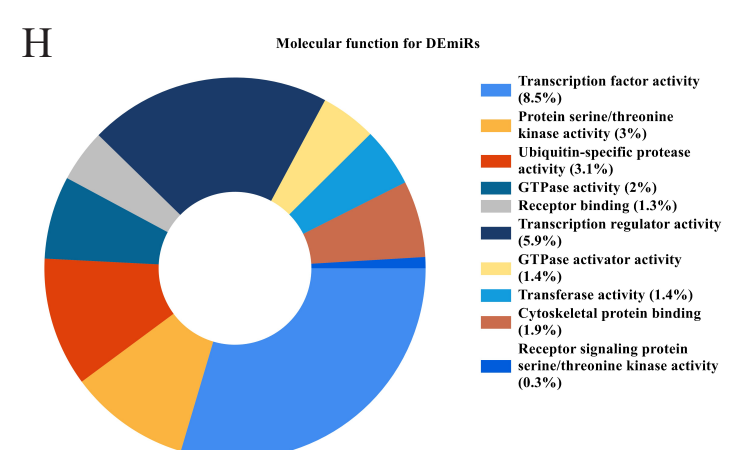

Supplement: mmc2.pdf [file mmc2.pdf]

**A**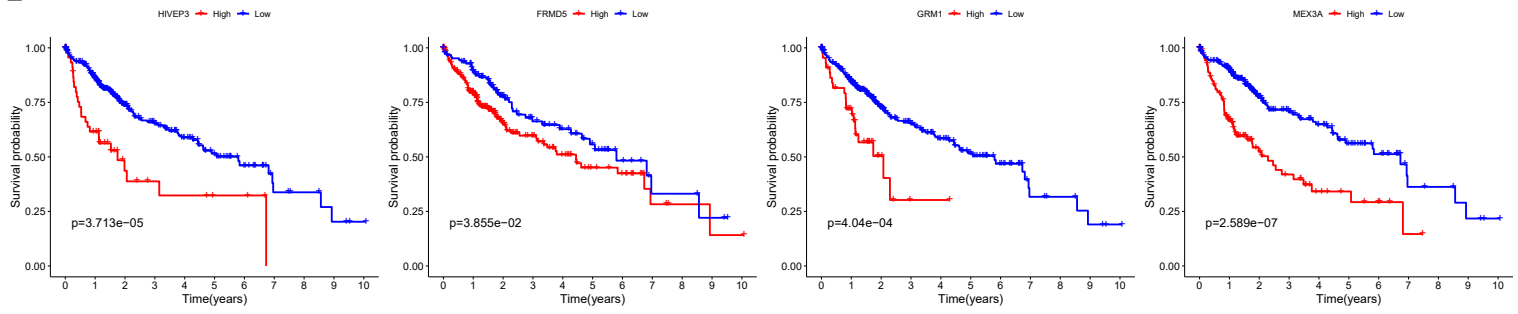**B**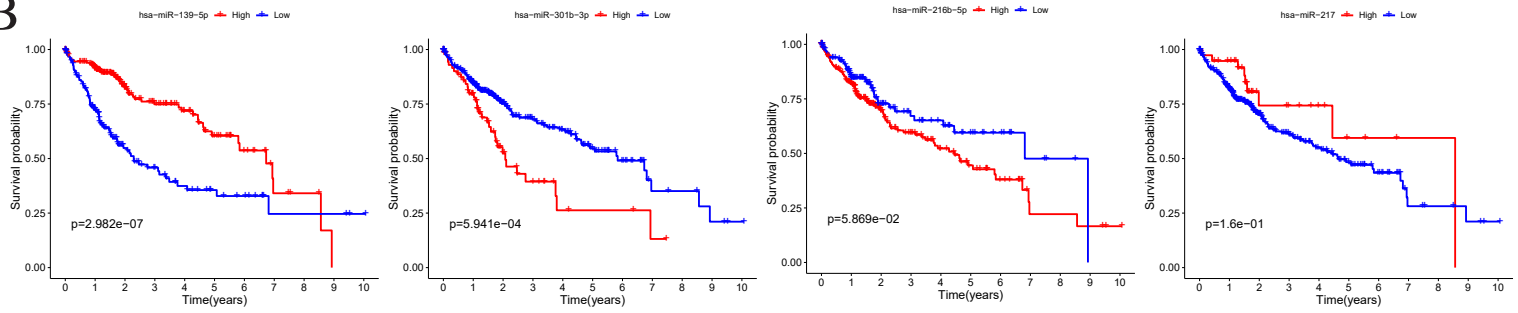**C**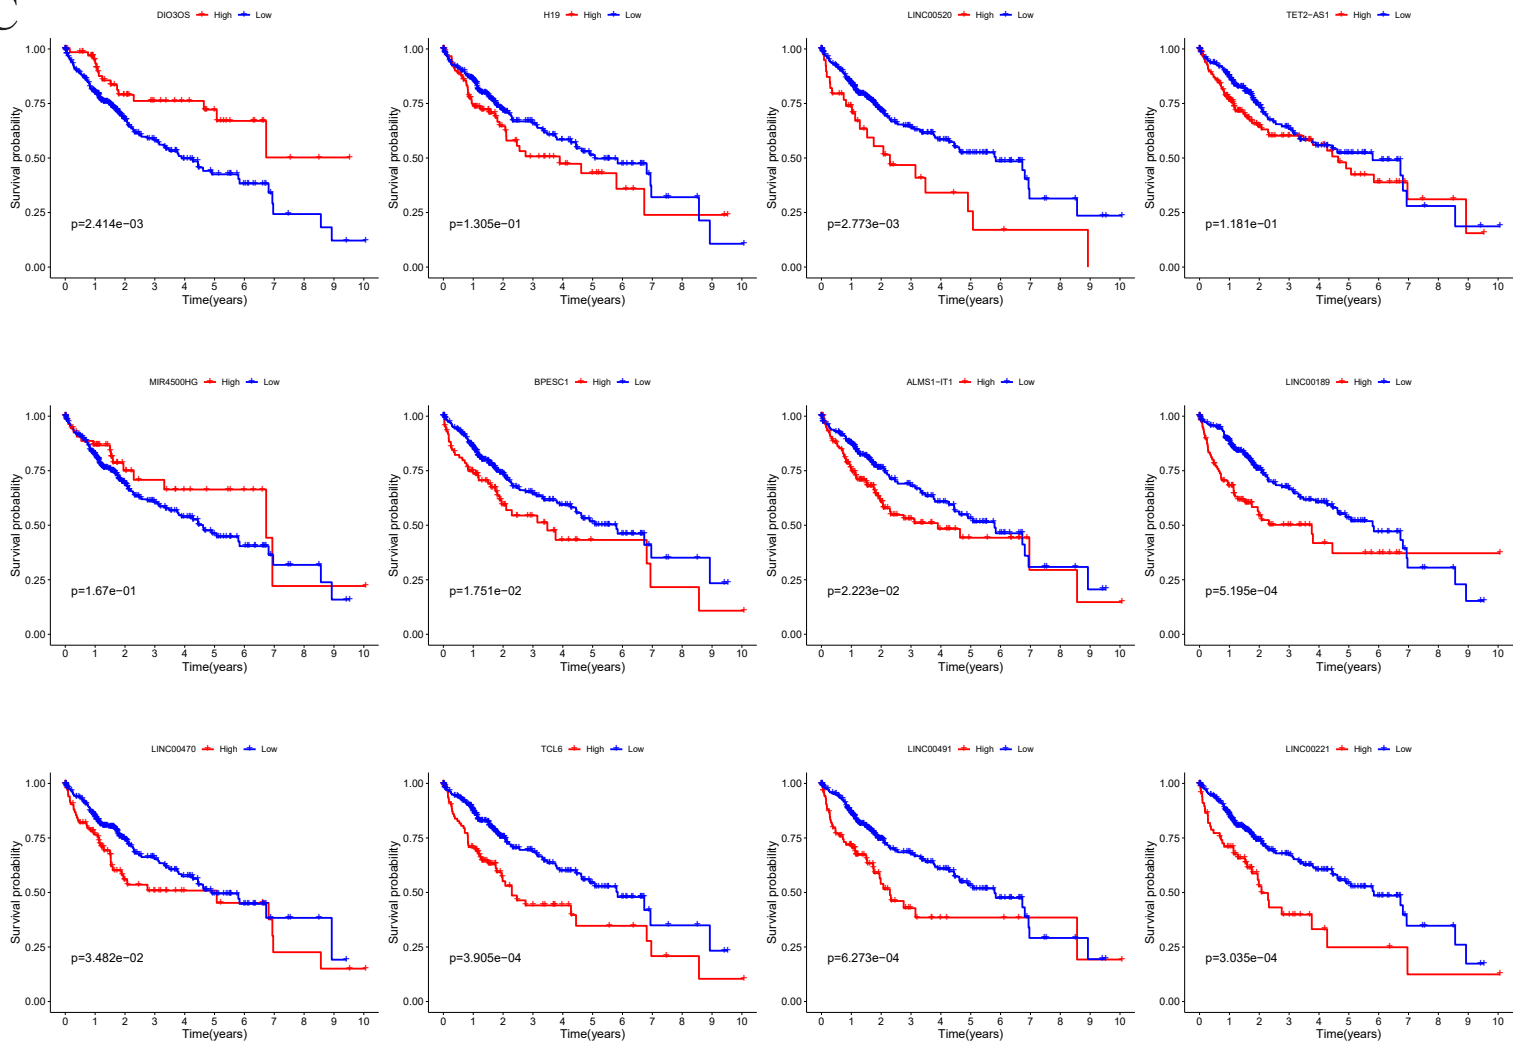

Supplement: mmc3.pdf [file mmc3.pdf]

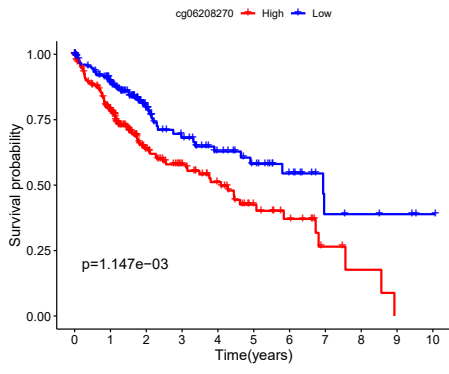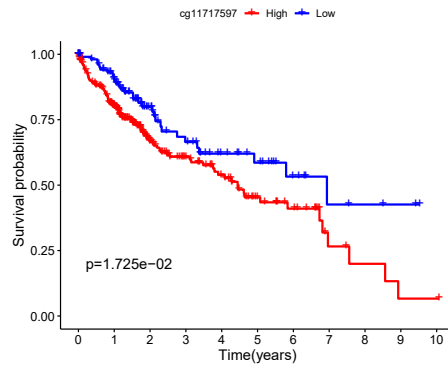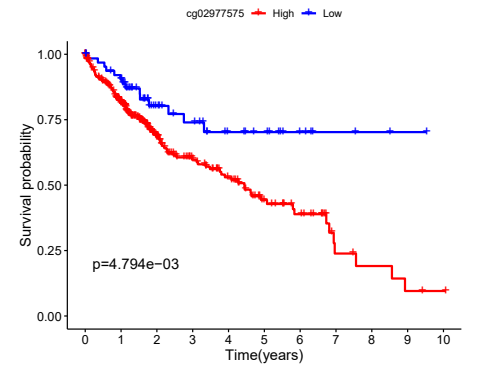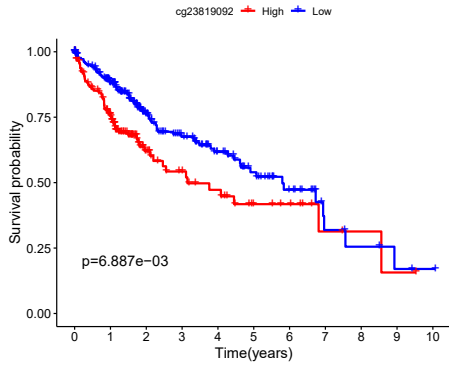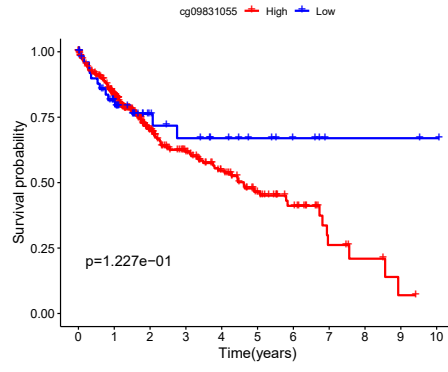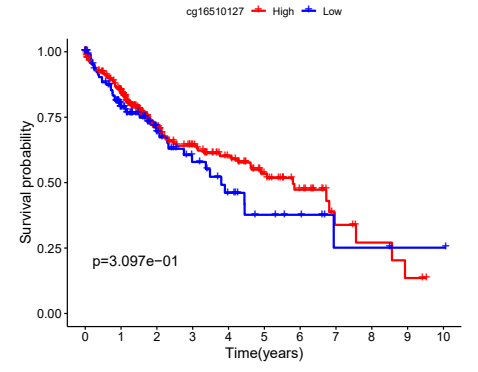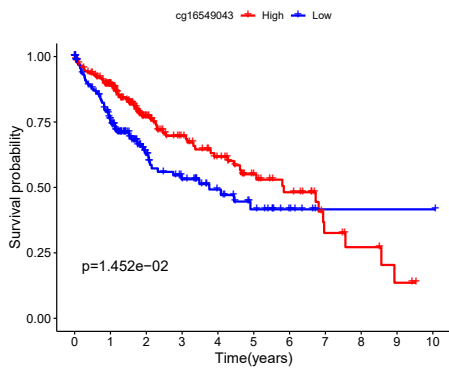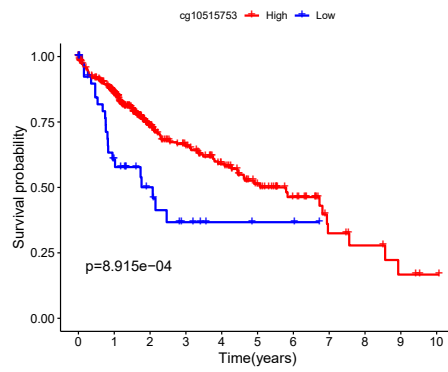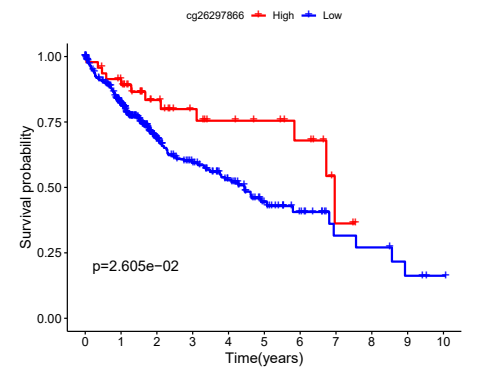

Supplement: mmc4.pdf [file mmc4.pdf]

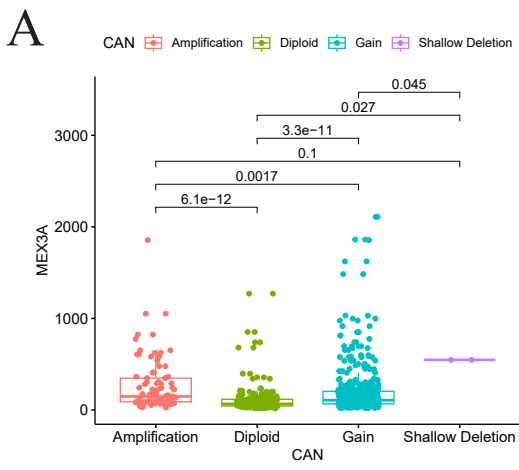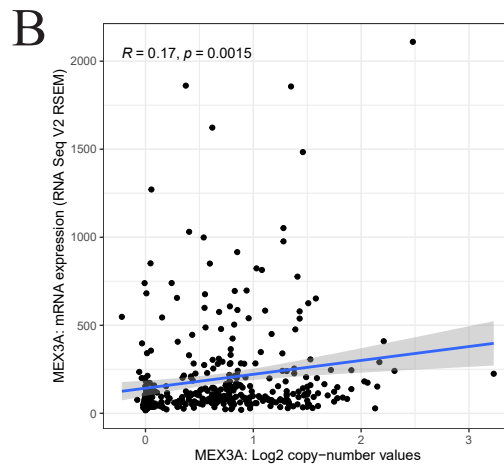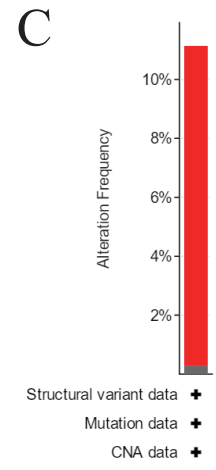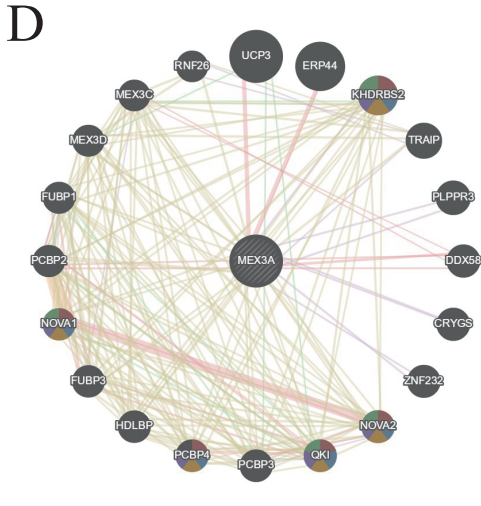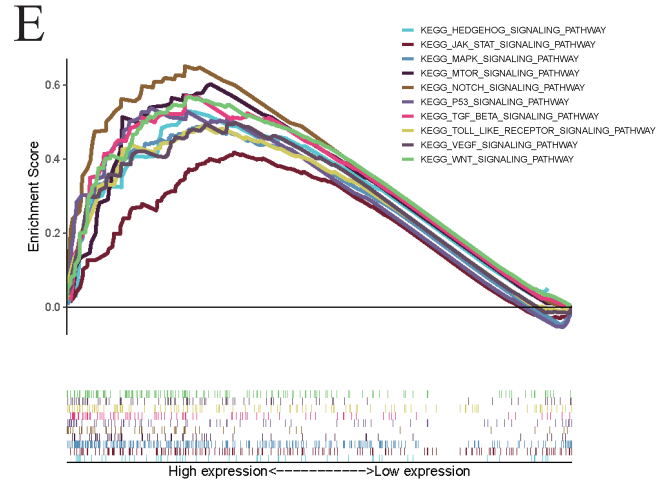

Supplement: mmc5.pdf [file mmc5.pdf]

**A**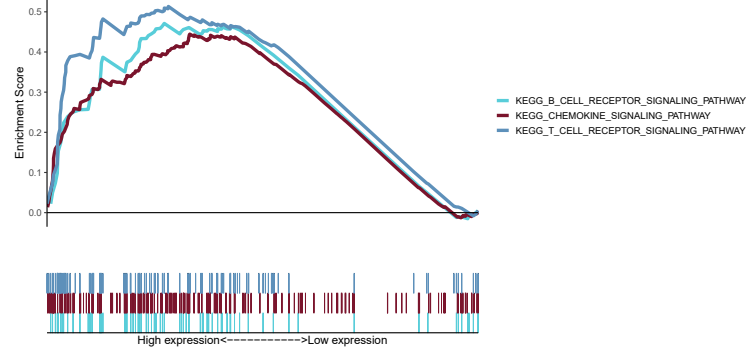**B**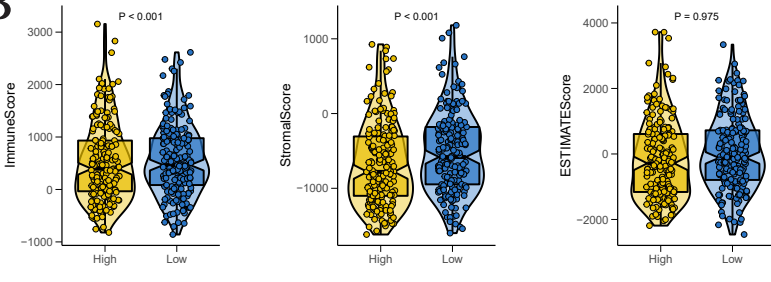**D**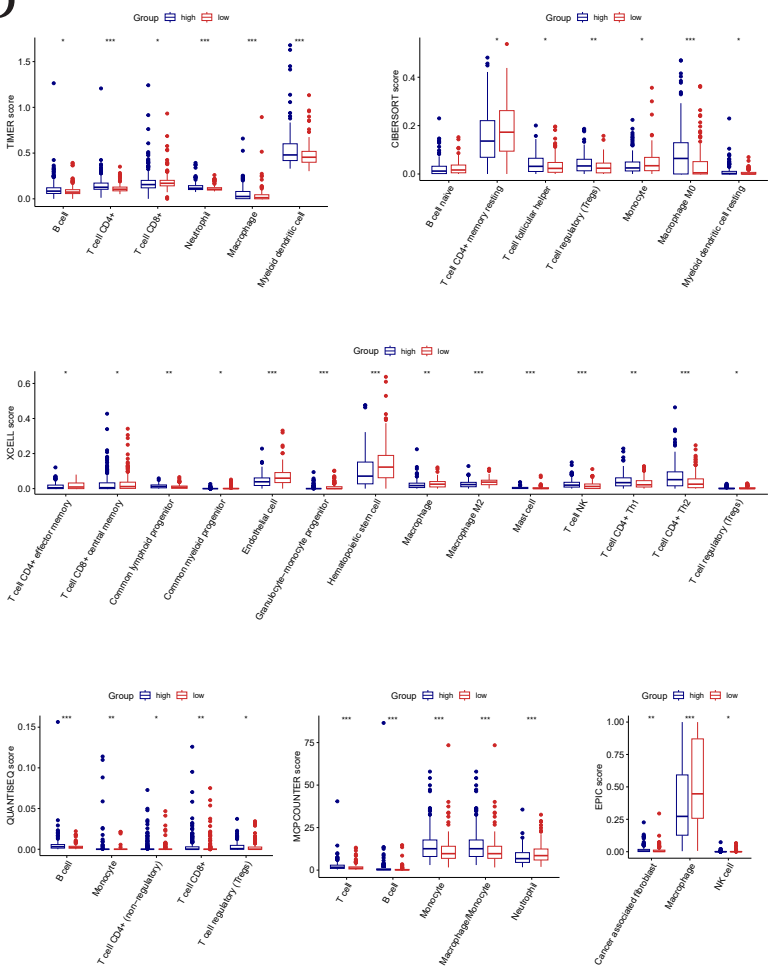**C**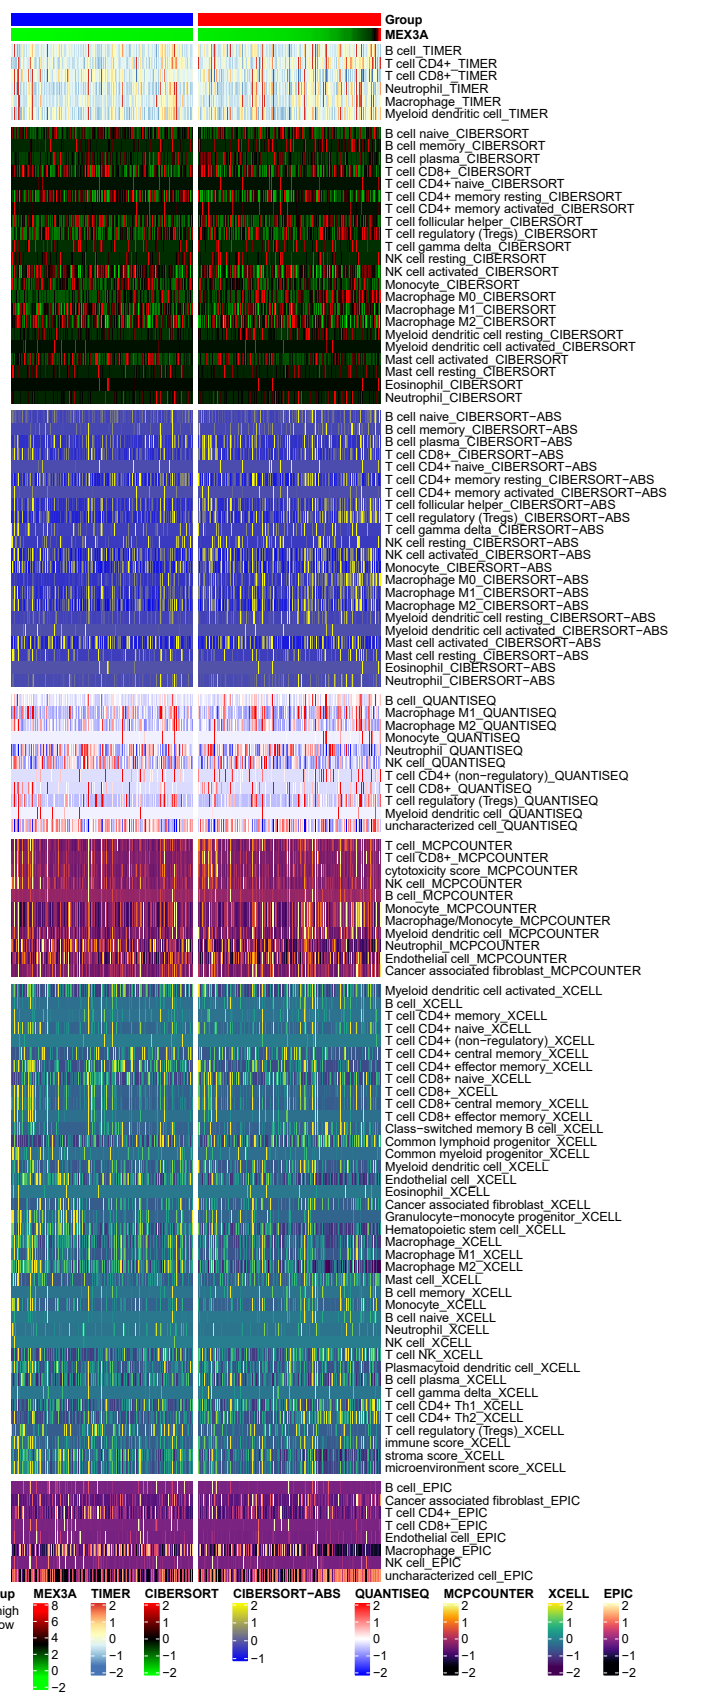

Supplement: mmc6.pdf [file mmc6.pdf]

A

### Correlation between CTRP drug sensitivity and mRNA expression

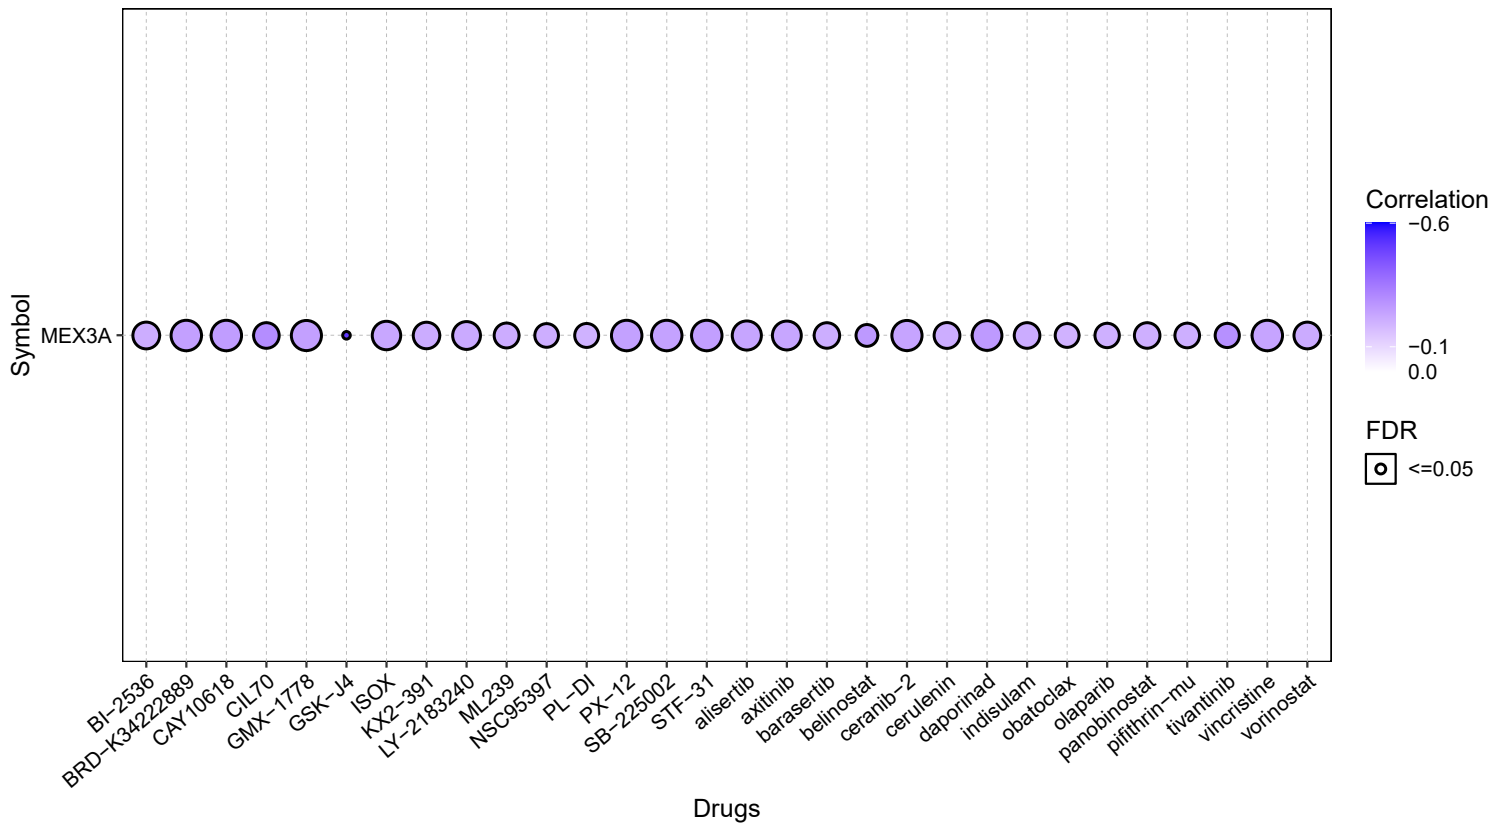

B

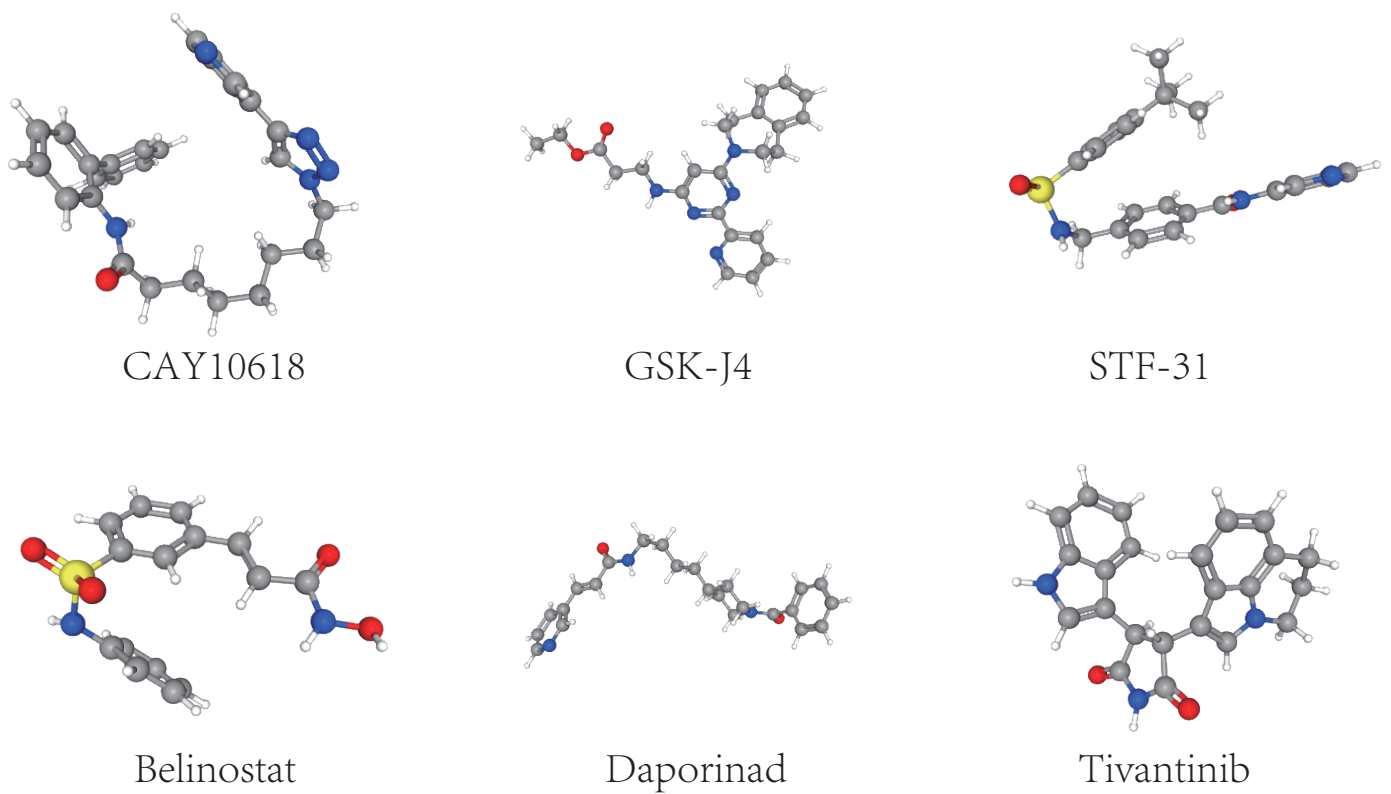

Supplement: mmc7.pdf [file mmc7.pdf]
